# Supplementary material for: Ceragenin CSA-13 displays high antibacterial efficiency in a mouse model of urinary tract infection
Source: PubMed Central journal article supplement (PMC9649698; doi:10.1038/s41598-022-23281-y), 2022-11-10
Supplement: 41598_2022_23281_MOESM1_ESM.pdf [file 41598_2022_23281_MOESM1_ESM.pdf]

**Supplementary Table 1.** Morphological and biochemical parameters of blood collected from mice used in this study.

|                              | <b>WBC</b> | <b>RBC</b> | <b>HGB</b> | <b>HCT</b> | <b>MCV</b> | <b>MCH</b> | <b>MCHC</b> | <b>PLT</b> |
|------------------------------|------------|------------|------------|------------|------------|------------|-------------|------------|
| <b>Control</b>               | 6,4        | 9,0        | 14,4       | 53,2       | 58,6       | 15,9       | 27,2        | 298,9      |
| <b>Untreated</b>             | 8,2        | 9,8        | 15,9       | 57,9       | 58,8       | 16,2       | 27,5        | 324,1      |
| <b>Treated</b>               | 7,8        | 9,0        | 14,9       | 53,2       | 58,8       | 16,1       | 27,2        | 316,5      |
| <b>CSA-13<br/>IRDye800CW</b> | 5,5        | 9,0        | 14,5       | 52,3       | 58,4       | 16,1       | 27,7        | 354,4      |
| <b>IRDye800CW</b>            | 6,0        | 7,3        | 11,8       | 42,6       | 57,8       | 16,1       | 27,9        | 209,4      |

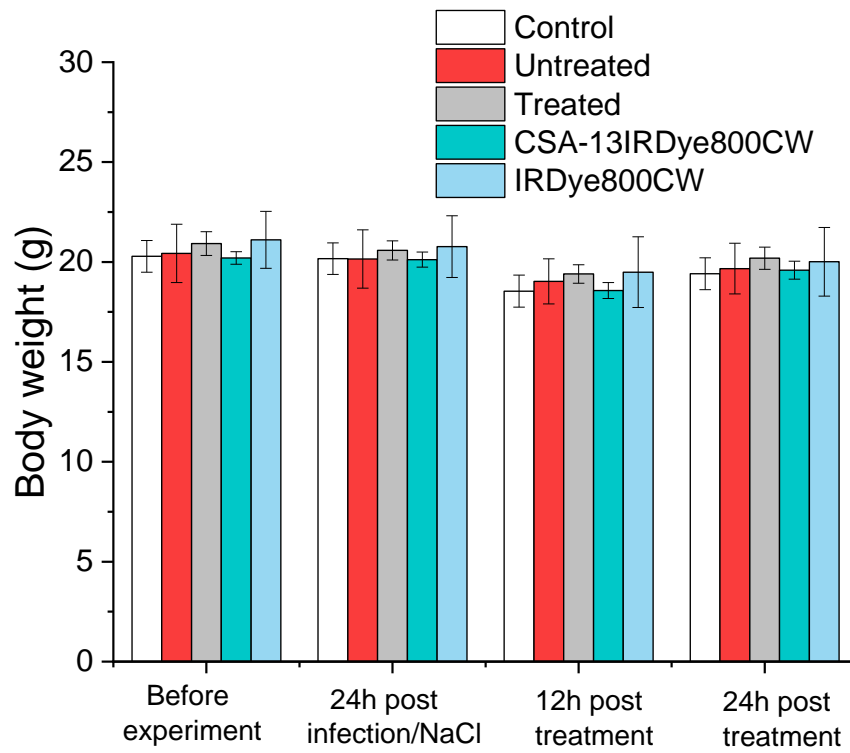

**Supplementary Figure 1.** Body weight of animals used in this study measured before experiment, 24h post infection and 12 and 24 hours post treatment.
